# Supplementary material
Source: Research Square preprint supplement (doi:10.21203/rs.3.rs-8912260/v1)
Supplement: Supplementary file 1 [file 5799a1249c6b33bcfeda5a4c.docx]

Table Gradient program for nicotine elution

| **Time (min)** | **Flow rate** | **Buffer % (A**) | **Methanol % (B)** |
| --- | --- | --- | --- |
| 0 .00 | 200 | 100 | 0 |
| 3 | 200 | 100 | 0 |
| 3.1 | 200 | 99.9 | 0.1 |
| 5 | 200 | 40 | 60 |
| 11 | 200 | 40 | 60 |
| 11.1 | 200 | 100 | 0 |
| 15 | 200 | 100 | 0 |

Table recovery data for different extraction solvent from Mushroom

| **Extraction solvent**  **(mushroom)** | **Spike recovery (n=3)** |
| --- | --- |
| Methanol (1% formic acid) | 99.25% |
| Methanol (5% formic acid) | 95% |
| Methanol | 96.80% |
| Methanol (1% ammonium hydroxide) | Not calculated |
| Methanol (5% ammonium hydroxide) | 99.10% |

Table Recoveries, means, STD and CV% for Mushroom Spiked samples at 0.01, 0.05 and 0.1 mg/kg.

| **Spiking level (mg/kg)** | **Recovery % (n=5)** | | | | | **Mean** | **STD** | **CV%** |
| --- | --- | --- | --- | --- | --- | --- | --- | --- |
|
| **0.01** | **103%** | **101%** | **92%** | **105%** | **105%** | **101** | **5** | **5** |
| **0.05** | **85%** | **85%** | **98%** | **91%** | **91%** | **89** | **5** | **6** |
| **0.1** | **90%** | **90%** | **87%** | **86%** | **90%** | **89** | **2** | **2** |
